RESEARCH ARTICLE

# Microplastic exposure and allergic rhinitis: Network toxicology, and molecular docking insights

Yaojun Wang<sup>1,2,3</sup>, Dandan Xu<sup>1,2,3\*</sup>

**1** Affiliated Hospital, Clinical Medical College, Hebei University, Baoding, Hebei, China, **2** Hebei Key Laboratory of Systems Biology and Gene Regulation, The First Affiliated Hospital of Hebei North University, Zhangjiakou, China, **3** Central Laboratory, The First Affiliated Hospital of Hebei North University

\* [1542493231@qq.com](mailto:1542493231@qq.com)

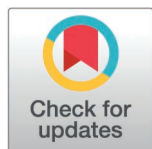

## Abstract

### Background

Microplastics (MPs), ubiquitous environmental pollutants, are increasingly associated with global health risks, yet their role in allergic rhinitis (AR) pathogenesis remains poorly understood.

### Methods

Toxicity profiles of four typical MPs (polyethylene [PE], polypropylene [PP], polyvinyl chloride [PVC], polystyrene [PS]) were evaluated using ADMETlab 3.0. MP-related targets and AR-associated genes were integrated from the CTD database and GSE43523 dataset. Functional enrichment (GO/KEGG) and PPI network analysis (STRING/GeneMANIA) were performed on overlapping genes. LASSO regression and expression validation identified key targets, and molecular docking (Autodock Vina) assessed interactions with potential therapeutics predicted by CTD.

### Results

ADMET analysis revealed MPs exhibit significant respiratory toxicity and ocular toxicity. We identified 301 MP toxicity targets, 1,026 AR differentially expressed genes (DEGs), and 15 overlapping pathogenic targets. Functional enrichment (GO/KEGG) demonstrated MPs disrupt respiratory mucosal homeostasis via apoptosis, mitochondrial autophagy, and inflammatory pathways. PPI network analysis and LASSO regression pinpointed DNAJB9, SQSTM1, and MAPK9 as core mediators: these genes were significantly downregulated in AR patients ( $P < 0.05$ ) and displayed robust diagnostic performance ( $AUC = 0.82\text{--}0.93$ ). Molecular docking revealed resveratrol binds these targets with high affinity, surpassing SQSTM1 ( $-5.8$  kcal/mol) and MAPK9 ( $-6.8$  kcal/mol), suggesting its potential to block MP-induced dysregulation.

## OPEN ACCESS

**Citation:** Wang Y, Xu D (2025) Microplastic exposure and allergic rhinitis: Network toxicology, and molecular docking insights. PLoS One 20(10): e0334162. <https://doi.org/10.1371/journal.pone.0334162>

**Editor:** Prem Rajak, Kazi Nazrul University, INDIA

**Received:** August 9, 2025

**Accepted:** September 23, 2025

**Published:** October 17, 2025

**Copyright:** © 2025 Wang, Xu. This is an open access article distributed under the terms of the [Creative Commons Attribution License](https://creativecommons.org/licenses/by/4.0/), which permits unrestricted use, distribution, and reproduction in any medium, provided the original author and source are credited.

**Data availability statement:** All relevant data are within the paper and its [Supporting information](#) files.

**Funding:** This work was funded by: Hebei Health Commission Scientific Research Foundation Project (20240240) Hebei Provincial Administration of Traditional Chinese Medicine Research Project (2024062) Hebei Provincial

Administration of Traditional Chinese Medicine Project (No. 2022147) Central Government Guides Local Science and Technology Development Fund Project, No. 246Z7768G Funding was awarded to DX. The funders had no role in study design, data collection and analysis, decision to publish, or preparation of the manuscript.

**Competing interests:** The authors have declared that no competing interests exist.

## Conclusions

MPs drive AR pathogenesis through respiratory toxicity pathways, with DNAJB9, SQSTM1, and MAPK9 serving as critical molecular mediators. Resveratrol, by modulating target-mediated programmed cell death, emerges as a promising therapeutic candidate for mitigating MP-induced AR.

## 1 Introduction

MPs have received a great deal of attention as an emerging environmental pollutant due to their widespread presence and potential health risks [1,2]. These particles, which are less than 5 millimetres in diameter, originate primarily from the physico-chemical degradation of plastic products, emissions from industrial production and the disposal of discarded consumer goods. Since Thompson et al. formally defined the concept in 2004 [3], there has been a significant positive correlation between global microplastic pollution levels and thermoplastic production. The primary sources are PE, PP, PS, PVC and PET [4]. Research indicates that global annual thermoplastic production has surpassed 400 million tonnes, and this sustained growth in plastic manufacturing is recognised as a key driver of escalating microplastic pollution [5–7]. While the exact conversion rate between plastic production and environmental microplastic release is unclear, the scientific community broadly agrees that the exponential increase in plastic production is a primary cause of the global microplastic pollution crisis [6]. Notably, microplastic pollution exhibits multi-medium characteristics, spanning soil, freshwater and marine ecosystems, the atmosphere, drinking water sources and even human tissues. Its contamination trajectory now encompasses the entire biogeochemical cycle [8–10].

The detection of MPs in air is chiefly dependent on the utilisation of sophisticated sampling and analytical techniques, including high-flow air samplers, impactor samplers, and wet deposition sampling. These methods have been demonstrated to be effective in the capture and identification of plastic particles across a wide size range (typically <5 µm) [11]. Recent epidemiological evidence indicates that AMPs can enter the human body via the respiratory tract, thereby posing a significant threat to respiratory health [2,12,13]. One study analysed venous blood samples from 22 non-fasting adult volunteers, detecting multiple MPs with concentrations as high as 7.1 µg/mL for a single type. In addition, related research has confirmed the presence of MPs in human placentas [14,15]. Prata's research estimates that the average person inhales approximately 26–130 microplastic particles daily via the respiratory tract [16], with nasal exposure potentially disrupting the body's energy metabolism balance [17]. In this context, AR, an IgE-mediated chronic inflammatory disease, has emerged as a research focus. The impact of AR on patients' quality of life is significant, with negative effects on socialisation, education, and work, as well as substantial economic burdens [18]. The typical symptoms associated with this condition include paroxysmal sneezing, watery nasal discharge, nasal congestion, and nasal itching [19–21]. Its pathogenesis is closely associated with environmental exposures,

particularly classic allergens such as pollen, dust mites, tobacco smoke, and pet dander [22]. Despite the recent emergence of studies exploring the potential correlation between microplastic exposure and the onset and progression of AR, the specific mechanisms underpinning this relationship remain to be fully elucidated.

Early exploratory studies have detected microplastic particles in patients with AR [12,23]. Among these, a prospective cohort study involving 66 participants (36 AR patients + 30 healthy controls) analyzed nasal samples and first confirmed microplastic accumulation in the nasal environment of AR patients [23]. Another cross-sectional study involving 33 AR patients and 22 healthy controls focused on nasal lavage fluid samples, further validating the specific distribution characteristics of MPs in the AR population [12]. These findings suggest that MPs may enter the human body through multiple pathways, including inhalation of polluted air, ingestion of contaminated food/water, and skin contact. Among these, the respiratory tract—as a mucosal interface directly connected to the atmospheric environment—is considered one of the key routes for microplastic exposure [1,24].

Network toxicology is an emerging research methodology grounded in the principles of network pharmacology and network biology. The integration of techniques such as bioinformatics, big data analysis, genomics, proteomics and metabolomics is a key feature of the methodology [25]. Network toxicology is an emerging research methodology grounded in the principles of network pharmacology and network biology. The integration of methodologies encompasses bioinformatics, big data analysis, genomics, proteomics and metabolomics. The present study aims to employ network toxicology, bioinformatics and molecular docking techniques to elucidate the potential toxicity mechanisms of MPs, building upon this methodological framework. The molecular pathways and target interactions linking MPs to AR will be investigated.

## 2 Materials and methods

### 2.1 Data collection related to MPs

The design methodology and flow of this study is demonstrated in Fig 1. In this study, the toxicological properties of MPs (PE, PP, PVC, and PS) were evaluated using ADMETlab 3.0 (<https://admetmesh.scbdd.com/>) [26]. Subsequently, the targets of action related to MPs were retrieved from the CTD (Comparative Toxicogenomics Database) database [27]. Furthermore, the 2D molecular structures of PE, PP, and PVC were obtained through PubChem (<https://pubchem.ncbi.nlm.nih.gov/>) to provide fundamental data for subsequent research analysis [28]. Finally, an interactive network was constructed using Cytoscape 3.8.2 software to visualise the relationship between these components and targets.

### 2.2 AR-related target acquisition and differential expression analysis

The GEO dataset (GSE43523) used in this study comes from the NCBI public database (<https://www.ncbi.nlm.nih.gov/gds/>). The original research has passed the corresponding ethical review (see the ‘Methods’ section of the dataset for specific information). A comprehensive search of the GEO database was conducted, with a focus on datasets involving the species “Homo sapiens”. The selection criteria included studies pertaining to nasal epithelial cells, with a particular emphasis on samples from both healthy volunteers and patients afflicted with seasonal AR. The dataset GSE43523 comprises samples from six patients diagnosed with seasonal AR and an equivalent number of healthy controls. Subsequently, the differentially expressed genes were screened by the “limma” package in R in order to identify significant differences between patients and healthy controls. In this process, invalid gene symbols or genes with multiple probe sets were removed and averaged. The statistical significance of the findings was determined by a  $p$ -value  $< 0.05$ . In volcano plots and analysis of variance scatter plots, the distribution of up- and down-regulated genes in patients with AR is demonstrated.

### 2.3 Intersection between MPs and AR

We matched AR targets with MPs action targets and made a Venn diagram using the Venny 2.1 online tool. The overlapping ones (intersections) in the Venn diagram show possible targets of MPs in allergic rhinitis. Also, we made a grouped heat map of the cross genes using ImageGP [29] to visualize the expression patterns of these genes.

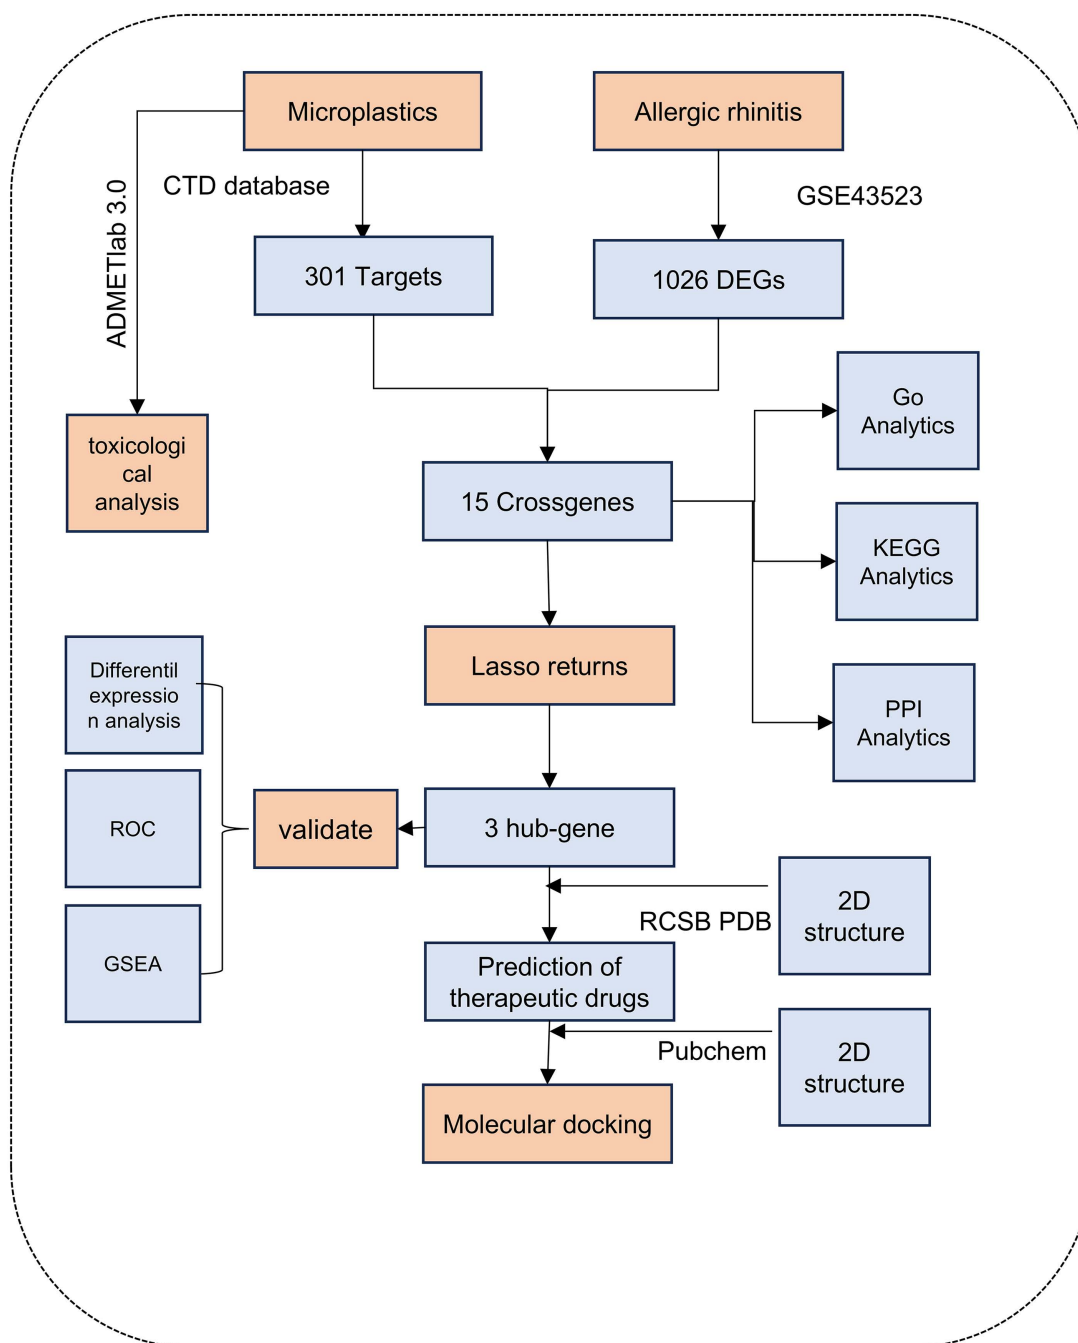

**Fig 1. Workflow of the analysis.**

<https://doi.org/10.1371/journal.pone.0334162.g001>

## 2.4 Enrichment analysis

To study the functions of the crossgenes, we did gene ontology (GO) and Kyoto Encyclopedia of Genes and Genomes (KEGG) pathway enrichment tests on these genes. We used R tools (clusterProfiler and enrichplot) [30]. We considered a P value below 0.05 as meaningful. We also used bubble plots to show the GO results and chordal plots to display the KEGG results..

## 2.5 Protein-protein network analysis

To study how the crossgenes interact with each other, we built a PPI network for potential MPs targets related to AR using the STRING database (<https://stringdb.org/>) [31]. We set the organism to “Homo sapiens” and used a medium confidence level (0.400) for interactions. Then we ran MCL clustering analysis through the STRING database to examine relationships between the overlapping genes. We also used the Genemama database to analyze functional networks of these targets and find possible signaling pathways.

## 2.6 Microplastic-target-pathway network

We used Cytoscape software to build a network showing connections between MPs, their targets, and related pathways in allergic rhinitis.

## 2.7 Predictive model construction and evaluation

To find key MPs targets in allergic rhinitis, we organized gene expression data from the overlapping targets and ran Lasso regression analysis using R’s “glmnet” package. Lasso regression helps prevent overfitting and improves model performance by using an L1 penalty to select important variables. We grouped the clinical data and created heatmaps with the key genes to see how the regression model related to gene expression. We also used ROC analysis to check how well the regression model could diagnose the condition.

## 2.8 Internal validation of key genes

To test how well key genes can diagnose AR, we first checked if these genes had different expression levels in AR patients using non-parametric tests. We showed the results with violin plots. Next, we used ROC curve analysis to confirm how well these genes could identify AR. We also ran GSEA (Gene Set Enrichment Analysis) [31] to find which specific signaling pathways were connected to these key genes in AR [32].

## 2.9 Prediction and molecular docking of key target-therapeutics

To find possible drugs for DNAJB9, SQSTM1, and MAPK9, we searched the CTD database for small-molecule compounds. We then built a “key gene–small-molecule drug” network using Cytoscape. By using Venn diagrams, we found small-molecule drugs that work on all three genes and identified one natural small-molecule compound as a potential treatment. We got the 3D structures of the target proteins from the RCSB PDB database [33]. Using PyMOL, we removed water molecules and original ligands. We then used AutoDock Tools 1.5.7 to add hydrogens, calculate charges, and adjust nonpolar hydrogen bonds. At the same time, we used Open Babel to change the drug’s .sdf file to PDB format. After setting the grid box size and genetic algorithm parameters, we ran molecular docking with AutoDock Vina. We used PyMOL to show the docking results, checking how well the target proteins bind to the natural drug and where they interact. These steps help support future drug development.

# 3 Results

## 3.1 Preliminary assessment of microplastic toxicity

The systematic assessment of environmental and health toxicity endpoints for four representative polymers—PE, PP, PVC, and PS—was conducted using the ADMETlab 3.0 platform. Results indicate (Fig 2A), For hERG blockade activity, polystyrene scored highest (0.217) with significantly elevated risk at 10  $\mu$ M (0.752, red alert), while polyvinyl chloride scored lowest (0.079, 0.663 at 10  $\mu$ M, yellow alert). For developmental and reproductive toxicity, polyethylene and polypropylene exhibited similar risks in DILI (0.542 and 0.562, yellow) and AMES (0.522 and 0.329, yellow) indicators, while polystyrene showed slightly higher risks in AMES (0.373, yellow) and carcinogenicity (0.405, yellow), while polyvinyl



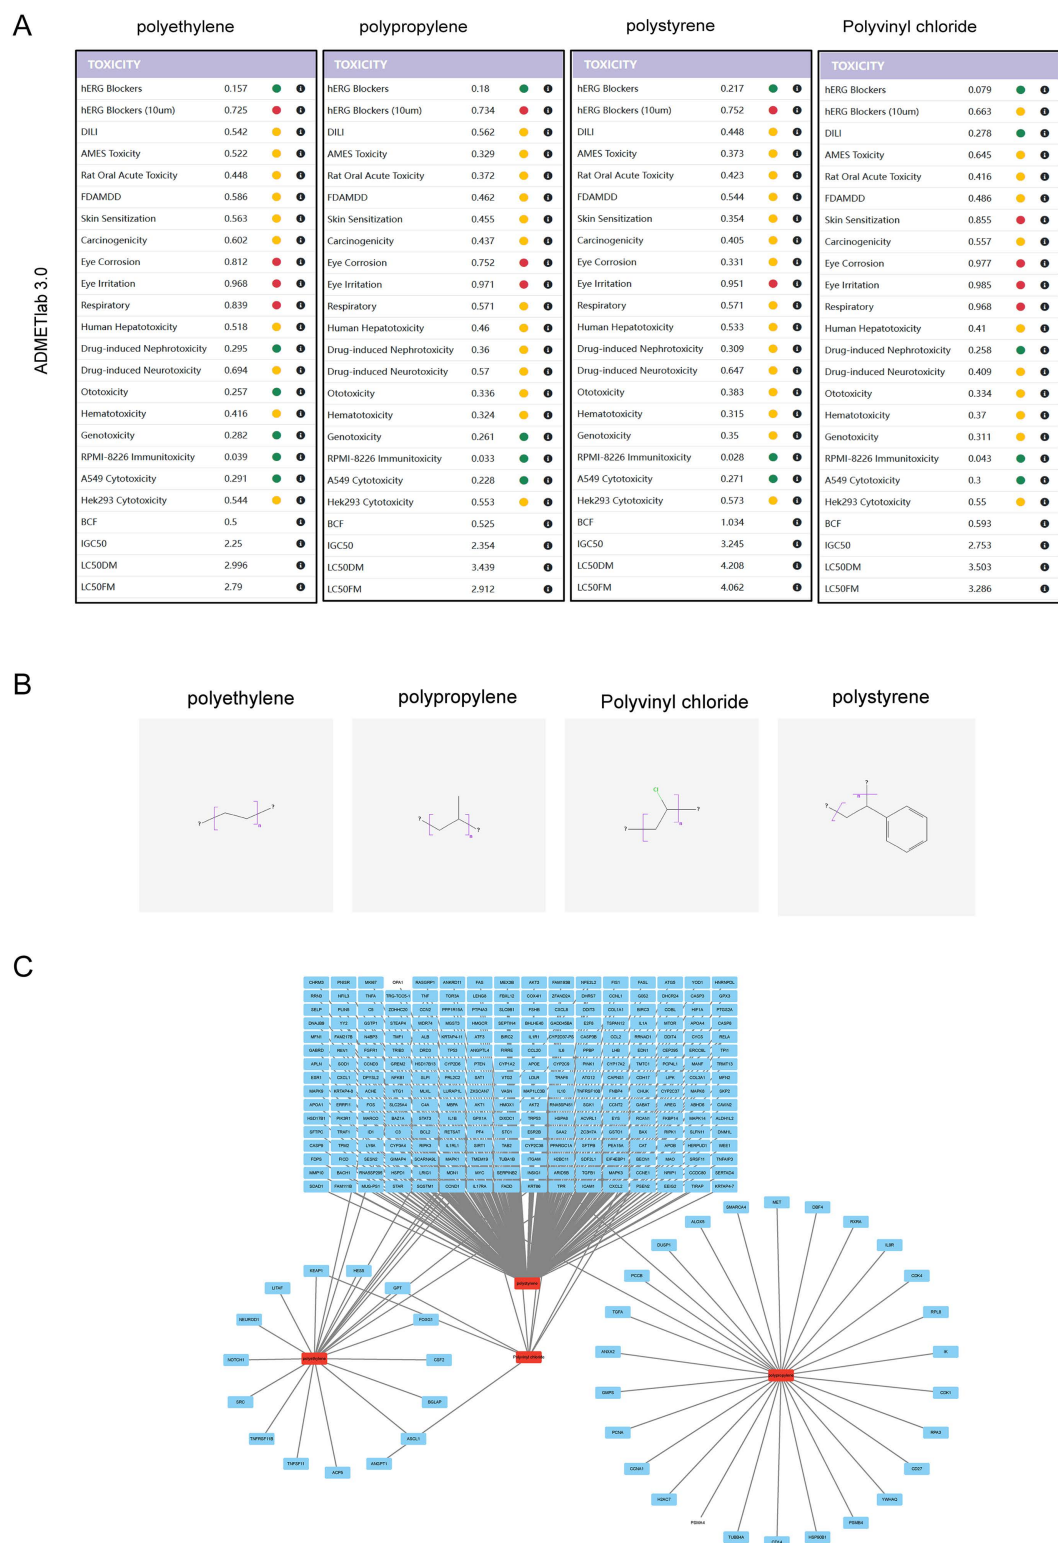

**Fig 2. A. A heat map of toxicity endpoints is generated based on the ADMETlab 3.0 platform. Red, yellow, and green represent high risk (>0.7), medium risk (0.3–0.7), and low risk (<0.3), respectively. The toxicity scores of each polymer are numerically marked to show the relative risk level. B. 2D structures of polyethylene, polypropylene, polyvinyl chloride, and polystyrene. C. Microplastic-target network diagram. Red squares represent microplastics and blue squares represent corresponding targets.**

<https://doi.org/10.1371/journal.pone.0334162.g002>

chloride was safest in DILI (0.278, green). In acute and chronic toxicity, polyvinyl chloride showed significantly higher risks than others in skin sensitization (0.855, red), eye irritation (0.985, red), and respiratory tract irritation (0.968, red). Regarding specific target organ toxicity, polystyrene and polyvinyl chloride exhibit higher risks for neurotoxicity (0.647 and 0.409, yellow, respectively); The above findings indicate that polyvinyl chloride poses a prominent risk for skin/respiratory sensitization, polystyrene warrants attention for hERG blockade risk, while polyethylene and polypropylene exhibit overall lower toxicity but still require consideration for eye irritation and other factors.

### 3.2 Identify the toxic targets induced by MPs and AR related targets

To identify toxicity targets related to MPs, we first obtained the 2D structures of MPs from the PubChem database (Fig 2B). According to the CTD database, PE has 23 targets, PP has 28, PVC has 9, and PS has 256. After integration and deduplication, we ultimately identified 301 potential microplastic-related toxicity targets. Finally, we constructed a microplastic-toxicity target network using Cytoscape software (Fig 2C), with the specific target list provided in Supplementary S1 Table.

We screened 1,026 DEGs related to AR from the GSE43523 dataset and visualized them using a volcano plot (Fig 3A). Among these genes, 461 were upregulated and 565 were downregulated. Fig 3B presents the overall distribution of the differentially expressed genes through a scatter plot, with the proportions of upregulated and downregulated genes labeled.

### 3.3 Identifying MPs and AR shared targets and functional enrichment

The intersection of microplastic toxicity targets and AR targets was analyzed using a Venn diagram, 15 shared pathogenic targets (Fig 3C, Supplementary S2 Table). After compiling the expression profiles of these genes, a heatmap was generated to visualize the results, where red indicates upregulated genes and green indicates downregulated genes (Fig 3D).

The biological functions of the intersecting genes were analyzed using GO and KEGG analyses. Function enrichment results revealed: Biological Processes (BP) primarily involved “Regulation of Cell Death,” “Apoptotic Process,” and “Positive Regulation of Protein Phosphorylation” (Fig 3E); Cellular Components (CC) were mainly enriched in “Endoplasmic Reticulum Lumen,” “Autophagosome,” and “Death Inducing Signaling Complex” (Fig 3F); Molecular Function (MF) was concentrated in “Enzyme Binding” and “Kinase Binding” (Fig 3G). KEGG analysis indicated that the intersecting genes were significantly enriched in “Measles,” “Apoptosis - multiple species,” and “Mitophagy - animal” (Fig 3H, Table 1). These intersecting targets may influence AR development by regulating apoptosis and autophagy mechanisms.

### 3.4 PPI network analysis and MPs-target-KEGG network

Protein-protein interaction (PPI) networks for intersecting genes were constructed using the String database, 25 nodes and 53 edges with an average node degree of 4.24 (Fig 4A). MCL clustering analysis (Fig 4B) revealed that the intersecting genes clustered in pathways such as “Autophagy - other, and Mitochondrion disassembly,” “Apoptosis - multiple species,” “Negative regulation of endothelial cell differentiation,” and “Endoplasmic reticulum chaperone complex, and ARMET-like,” consistent with the functional enrichment analysis results.

GeneMANIA tool predicted 20 functionally similar genes (Fig 4C). Central genes are positioned in the inner circle, while predicted genes occupy the outer circle. Functional analysis revealed that most genes were associated with cell death-related pathways including “Apoptosis - multiple species,” “Autophagy - animal,” “Cell cycle,” and “Cellular senescence.” Environmental information primarily involved inflammatory pathways such as “TNF signaling pathway,” “MAPK signaling pathway,” and “ErbB signaling pathway.” human diseases focused on inflammatory conditions like “Epstein-Barr virus infection” and “Human T-cell leukemia virus 1 infection”; biological systems involved inflammatory responses such as “Toll-like receptor signaling pathway,” “Fc epsilon RI signaling pathway,” and “RIG-I-like receptor signaling pathway” (Fig 4D). These intersecting genes primarily promote AR progression by regulating cell death-related pathways.

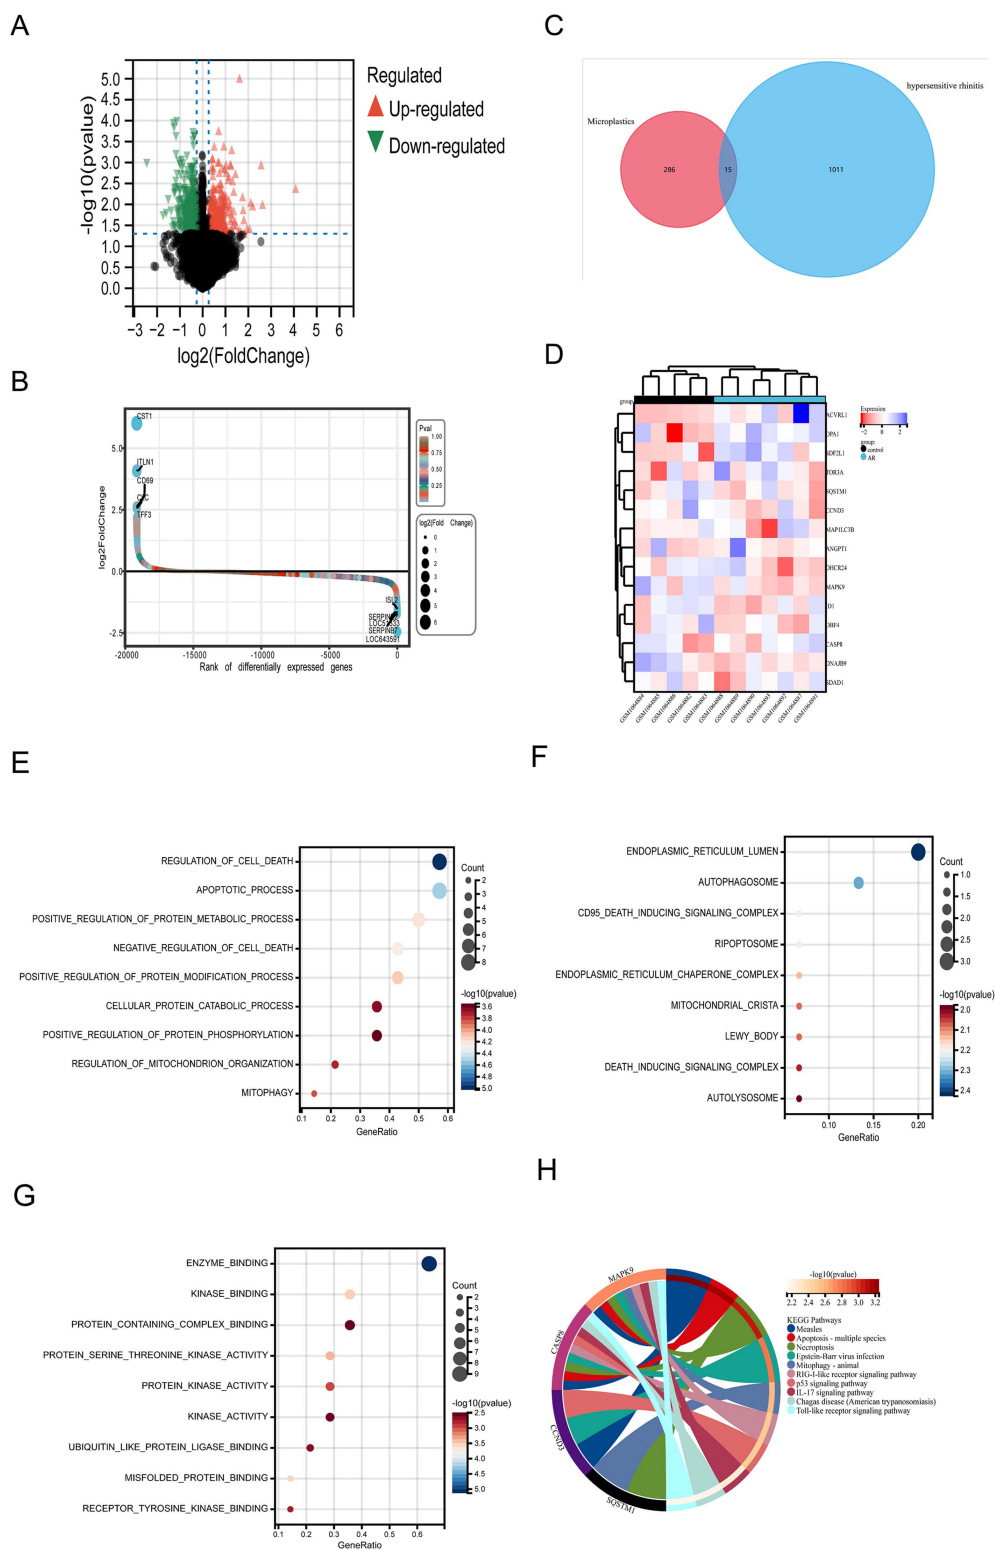

**Fig 3. Screening of differentially expressed genes and functional enrichment analysis of crossover genes in allergic rhinitis.** **A.** The red and green colors indicate significantly upregulated and downregulated genes. **B.** Scatter plot of differentially expressed genes in AR. **C.** The Venn diagram illustrates the intersection of genes between microplastic toxicity targets and differentially expressed genes for AR. **D.** The clustered heatmap shows the



expression profile data of the 15 intersecting genes in AR. Red color represents gene expression upregulation and blue color represents gene expression downregulation. **E-G.** Biological process (BP), cellular composition (CC), and molecular function (MF) were presented using bubble plots. The size of the bubbles represents the number of enriched genes, and the color represents the significance. **H.** KEGG analysis results were presented using string diagrams, with different colors indicating different significant pathways and their associated genes.

<https://doi.org/10.1371/journal.pone.0334162.g003>

**Table 1. KEGG enrichment analysis.**

| Description                               | pvalue      | geneID             |
|-------------------------------------------|-------------|--------------------|
| Measles                                   | 0.000569151 | CASP8/MAPK9/CCND3  |
| Apoptosis – multiple species              | 0.000698554 | CASP8/MAPK9        |
| Necroptosis                               | 0.00090902  | SQSTM1/CASP8/MAPK9 |
| Epstein-Barr virus infection              | 0.001697599 | CASP8/MAPK9/CCND3  |
| Mitophagy – animal                        | 0.002864927 | SQSTM1/MAPK9       |
| RIG-I-like receptor signaling pathway     | 0.003315143 | CASP8/MAPK9        |
| p53 signaling pathway                     | 0.003503966 | CASP8/CCND3        |
| IL-17 signaling pathway                   | 0.005782098 | CASP8/MAPK9        |
| Chagas disease (American trypanosomiasis) | 0.006919876 | CASP8/MAPK9        |
| Toll-like receptor signaling pathway      | 0.007185568 | CASP8/MAPK9        |

<https://doi.org/10.1371/journal.pone.0334162.t001>

To show the relationships among MPs, AR, and KEGG signaling pathways, we constructed a MPs-target-pathway network using Cytoscape software (Fig 4E). This network comprises 28 nodes and 38 edges. Results indicate that polystyrene has the highest number of targets, while CASP8 and MAPK9 are enriched in the most pathways.

### 3.5 Predictive model construction and verification

Together with the risk factors identified by the Lasso linear regression analysis, we selected three key genes (DNAJB9, SQSTM1, and MAPK9) involved in the microplastic-induced AR pathway as risk factors (Fig 5A–5B). Phenotypic heatmap analysis revealed that DNAJB9, SQSTM1, and MAPK9 were all downregulated in AR patients compared to healthy individuals and were associated with higher risk (Fig 5C).

To further validate the diagnostic value of DNAJB9, SQSTM1, and MAPK9 in AR, we conducted differential expression analysis, ROC curve analysis, and GSEA analysis. DEGs revealed (Fig 5D) that DNAJB9, SQSTM1, and MAPK9 all exhibited a downward trend in AR patients, with  $P < 0.05$  indicating statistical significance. ROC curve analysis results (Fig 5E–5G, Table 2) showed that the area under the curve (AUC) for DNAJB9 was 0.82 (95% CI: 1.0–0.46), SQSTM1 had an AUC of 0.82 (95% CI: 1.0–0.52), and MAPK9 had an AUC of 0.93 (95% CI: 1.0–0.76), all demonstrating good diagnostic performance. These findings suggest that DNAJB9, SQSTM1, and MAPK9 may serve as key targets for MPs influencing the progression of AR disease.

We further employed GSEA to explore the functional pathways enriched by genes, revealing that DNAJB9 was significantly enriched in the mTOR signaling pathway (ES=0.639, NES=1.49,  $p=0.0000$ ), thyroid cancer (ES=0.714, NES=1.65,  $p=0.0176$ ), and folate biosynthesis (ES=0.852, NES=1.60,  $p=0.0228$ ) (Fig 5H). SQSTM1 showed enrichment in small cell lung cancer (ES=0.598, NES=1.50,  $p=0.0021$ ), phosphatidylinositol signaling system (ES=0.607, NES=1.39,  $p=0.0139$ ), mTOR signaling pathway (ES=0.617, NES=1.37,  $p=0.0172$ ), among others (Fig 5I). MAPK9 was primarily enriched in pathways including basic transcription factors (ES=0.713, NES=1.67,  $p=0.0021$ ),  $\beta$ -alanine metabolism (ES=0.715, NES=1.65,  $p=0.0021$ ), and proteasome (ES=0.579, NES=1.47,  $p=0.0147$ ) pathways (Fig 5J). This suggests that these three genes may participate in relevant biological processes or disease progression by regulating multiple key biological pathways.

A

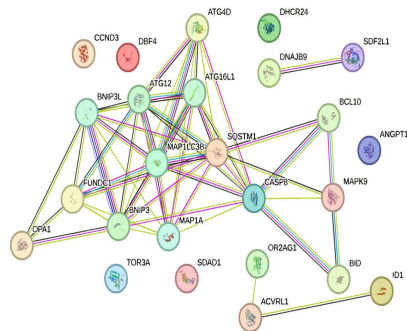

B

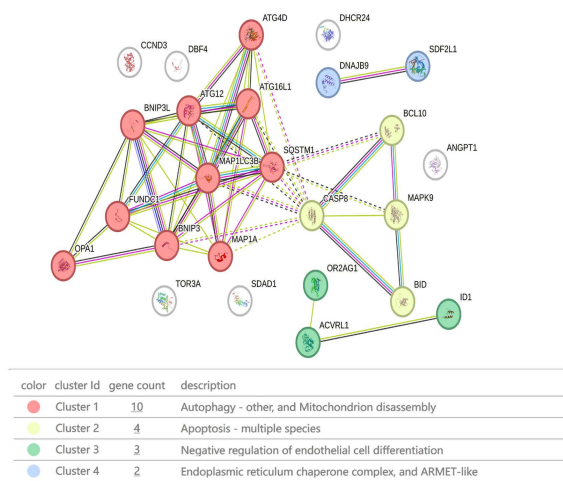

C

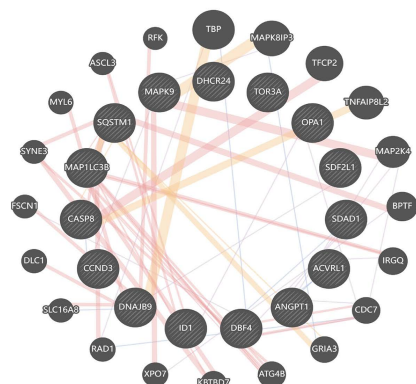

D

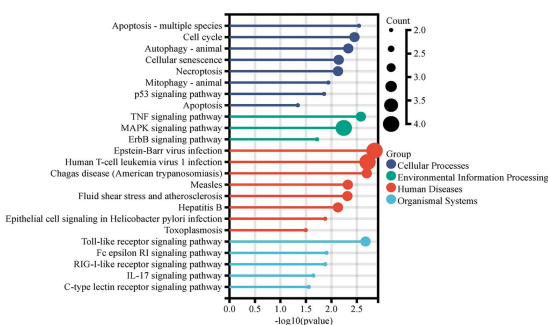

E

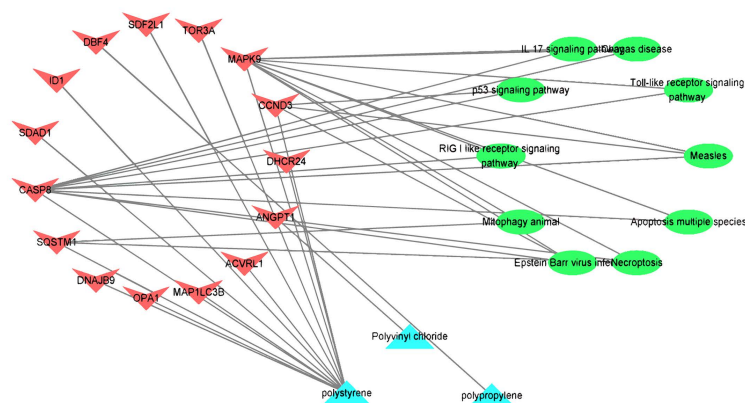

**Fig 4. Protein-protein network analysis.** **A.** The PPI network of intersecting genes is shown based on the STRING database. Circles represent gene nodes, and the frequency of connecting lines indicates the degree of interaction. **B.** The MCL clustering network of intersecting genes was demonstrated based on the STRING database. Different colored circles represent different clusters. **C.** PPI network of intersecting genes is shown based on

the Genemama website. The inner black circles represent intersecting gene nodes and the outer black circles represent predicted gene nodes. The frequency of connecting lines indicates the degree of interaction. **D.** Demonstration of functional enrichment of intersecting genes in the Genemama database. Different colors represent different biological functions, and the size of the circle represents the number of genes enriched. **E.** Microplastic-target-pathway network. Blue triangles represent microplastics, red inverted triangles represent targets, and green ovals represent pathways.

<https://doi.org/10.1371/journal.pone.0334162.g004>

### 3.6 Prediction and molecular docking of therapeutic agents for key toxicity targets

To identify small-molecule drugs associated with DNAJB9, SQSTM1, and MAPK9, we searched the CTD database. Results showed that DNAJB9 predicted 228 drugs, SQSTM1 predicted 706 drugs, and MAPK9 predicted 474 drugs. Based on these findings, we constructed a key target-small-molecule drug network (Fig 6A). Through Venn diagram analysis, we identified 118 compounds common to all three genes (Fig 6B). Literature review indicated that resveratrol [34–38], among these 118 compounds, may mitigate microplastic toxicity damage and serves as a potential therapeutic agent.

The results of molecular docking indicate that resveratrol can form stable binding conformations with core target proteins (DNAJB9, SQSTM1, MAPK9). Binding affinity data (Fig 6C–6E, Table 3) further validate its strong interaction characteristics: The binding energy between resveratrol and DNAJB9 reached  $-94.8$  kcal/mol (significantly below the high-affinity threshold of  $-5$  kcal/mol), while the binding energies with SQSTM1 ( $-5.8$  kcal/mol) and MAPK9 ( $-6.8$  kcal/mol) also met the criteria for high affinity. Key interaction sites are concentrated within the active pockets of the proteins, indicating that resveratrol forms highly stable bonds by occupying core functional regions of the targets. These findings suggest that the low binding energies (highly stable bonds) of resveratrol with the three proteins effectively block microplastic-induced abnormal signaling pathways, providing a molecular basis for its potential as a therapeutic agent for microplastic-related AR.

## 4 Discussion

MPs refer to plastic fragments or particles smaller than 5 millimeters in diameter. They primarily enter the human body through three routes: inhalation (via the respiratory system), ingestion (via the digestive tract), and skin contact. As ubiquitous environmental pollutants, MPs significantly increase human exposure risks due to their small particle size and widespread distribution. In particular, inhalation of plastic fibers through the respiratory tract may pose potential threats to human health [39]. Research indicates that the toxic effects of MPs exhibit significant size dependence—smaller particle sizes possess larger specific surface areas and higher surface activity, making them more prone to adsorbing toxic organic pollutants and inorganic pollutants from the environment. These adsorbed substances can subsequently impact organisms through bioaccumulation or direct toxic effects [40]. In recent years, the association between microplastic exposure and respiratory toxicity has garnered increasing attention, potentially contributing to respiratory diseases by inducing oxidative stress, inflammatory responses, or epithelial cell damage [13]. However, existing research primarily focuses on general toxicological effects of MPs, with limited investigation into their specific respiratory injury mechanisms. Therefore, this study integrated multi-omics data with bioinformatics methods to identify three key targets (DNAJB9, SQSTM1, MAPK9). Their diagnostic efficacy in AR was validated through heatmaps and ROC curve analysis. Results indicate that these three targets are significantly downregulated in AR patients and highly correlated with disease risk. This suggests they may participate in microplastic-induced AR progression by regulating pathways such as apoptosis and autophagy.

Several factors contribute to the mechanism by which MPs invade the human body and cause tissue damage. Research by Mengyuan Liu's team reveals that microplastic particles can migrate to respiratory epithelial tissues through diffusion, cell penetration, or endocytosis, subsequently being internalized by epithelial cells and entering the intracellular space [13]. Notably, the efficiency of microplastic internalization and its toxic effects are closely related to particle size, surface charge, and other physicochemical properties [41]. Halimu et al.'s findings indicate that smaller or positively charged microplastic particles exhibit faster internalization rates and more pronounced toxic effects compared to larger or negatively charged particles [42]. Beyond direct internalization, disruption of the epithelial barrier function represents

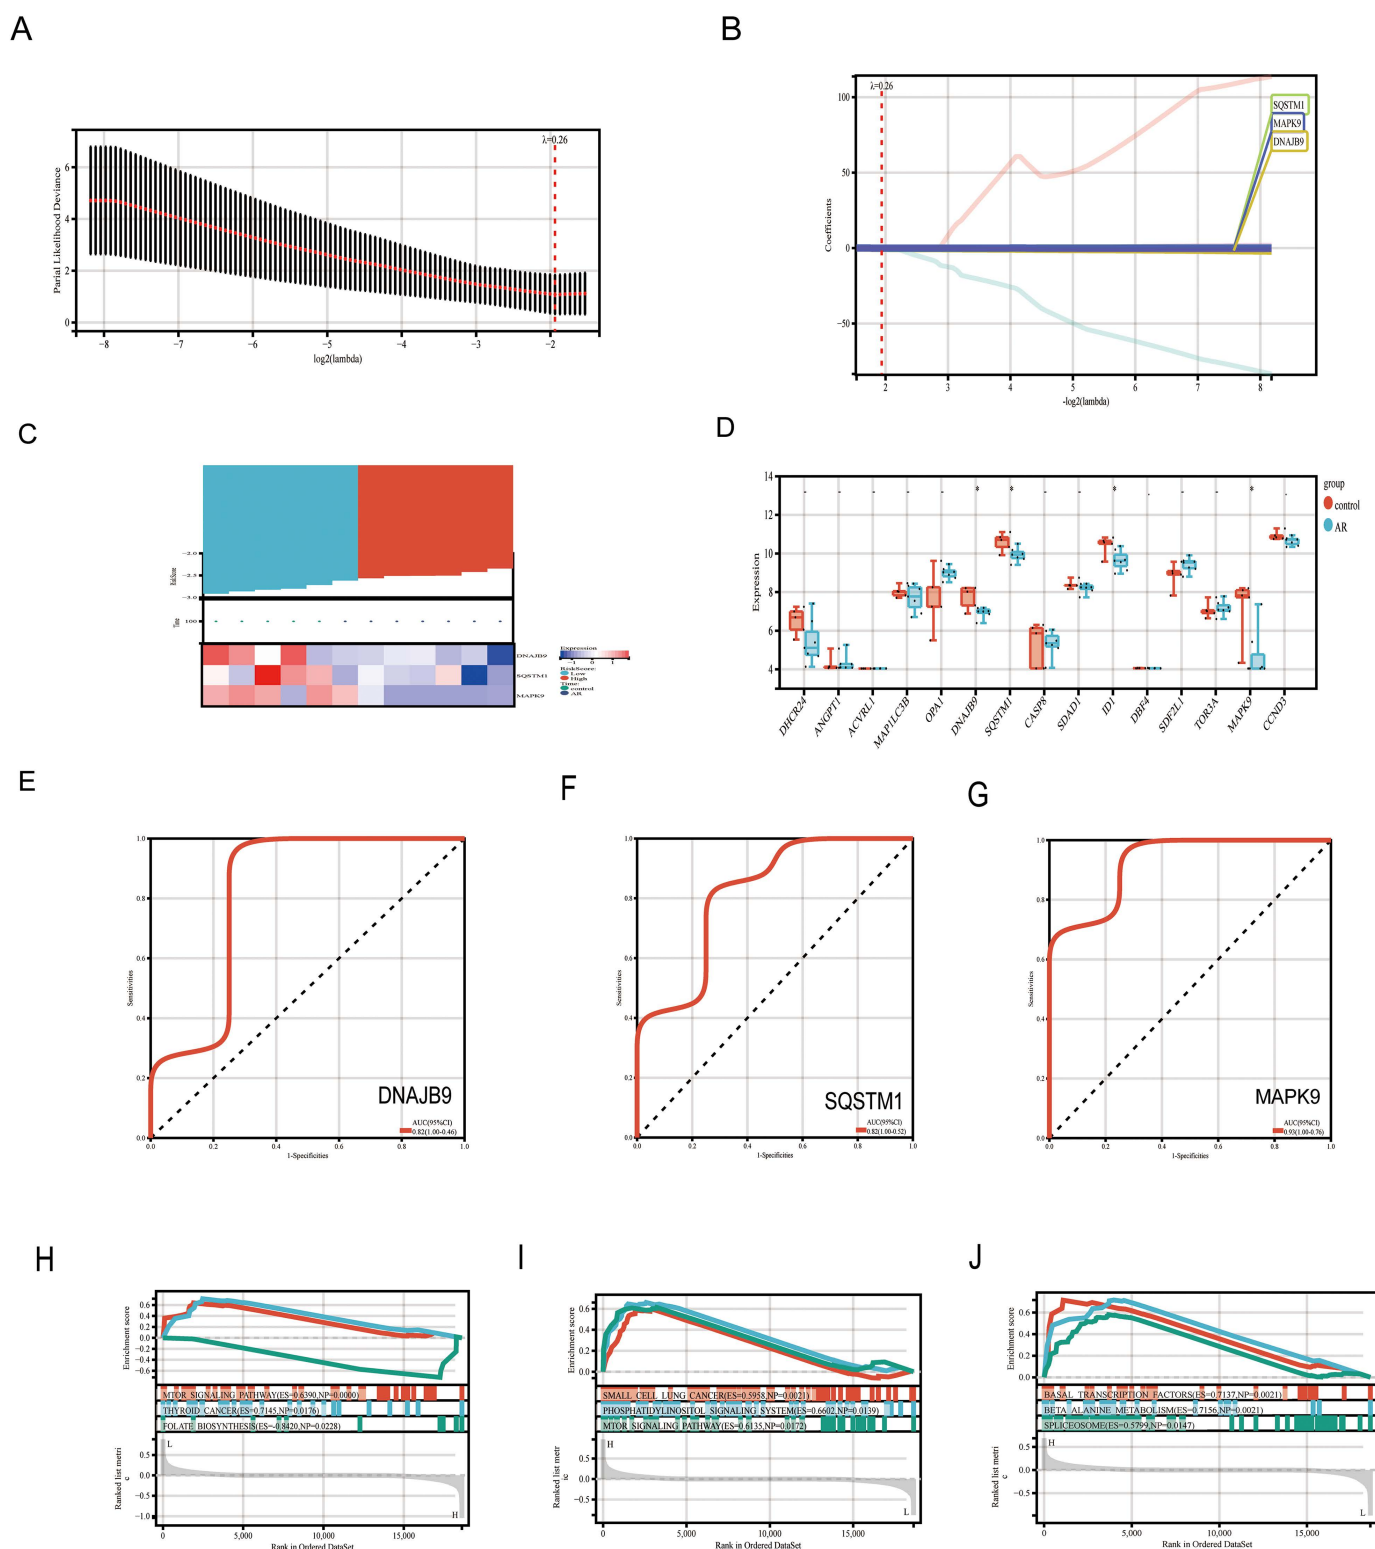

**Fig 5. LASSO regression screening of key targets and their internal validation analysis.** A-B. Lasso regression was used to screen key targets, and 3 of them were identified as key targets of microplastics acting in AR. C. Prognostic heatmap demonstrating the expression profile data of 3 key targets in AR. The upper part of it represents the risk score, where red color represents high risk and blue color represents low risk. The lower part

represents the differential expression profiles of the genes. Blue color represents gene expression down-regulation and red color represents gene expression up-regulation. **D.** Box plot demonstrating the differential expression of 15 intersecting genes between AR and normal controls. \* $p < 0.05$ . **E-G.** ROC curves validate the diagnostic efficacy of the 3 key targets. **H-J.** Single-gene GSEA analysis of the 3 key targets. The upper part represents the enrichment score, the middle part represents the enrichment pathway, and the lower part represents the risk Rank.

<https://doi.org/10.1371/journal.pone.0334162.g005>

**Table 2. ROC curve analysis of AUC and 95% CI for DNAJB9, SQSTM1, and MAPK9.**

| Gene   | AUC  | 95% Confidence Interval (CI) |
|--------|------|------------------------------|
| DNAJB9 | 0.82 | 0.76–0.86                    |
| SQSTM1 | 0.81 | 0.75–0.85                    |
| MAPK9  | 0.83 | 0.77–0.87                    |

<https://doi.org/10.1371/journal.pone.0334162.t002>

another key pathway for microplastic entry into the body [13]. Existing studies reveal that in mouse models exposed to MPs, the expression level of tight junction protein ZO-1 in the airway epithelium is significantly downregulated, and trans-epithelial electrical resistance (TEER) is reduced, indicating compromised airway epithelial barrier integrity [43]. This barrier disruption is often accompanied by increased secretion of pro-inflammatory factors and activation of oxidative stress pathways. Mechanistic studies by Xu et al. demonstrated that MPs can be internalized into airway epithelial cells, stimulating secretion of heat shock protein 90 $\alpha$  (HSP90 $\alpha$ ), which subsequently activates the PI3K/AKT/mTOR signaling pathway, ultimately leading to airway epithelial cell apoptosis and barrier dysfunction [44]. In summary, MPs, due to their minute particle size, can cause damage to human tissues at the cellular level through direct internalization and disruption of the epithelial barrier.

Additionally, immune system activation plays a crucial role in the microplastic-induced respiratory injury process. Enrichment analysis results from this study indicate that microplastic-induced AR injury is closely associated with immune regulatory mechanisms such as the IL-17 signaling pathway, Toll-like receptor (TLR) signaling pathway, and apoptosis. Previous studies have demonstrated that microplastic exposure significantly exacerbates the imbalance in Th1/Th2 immune responses [45,46]. Animal experiments demonstrate that microplastic exposure elevates cytokine levels (including IL-13, IL-10, IFN- $\gamma$ , and TNF- $\alpha$ ) in asthmatic mouse models and promotes total IgE secretion, thereby disrupting the Th1/Th2 cytokine balance [47]. Notably, Yang et al. found that while microplastic exposure elevated serum IgG1 levels in normal mice, it had no significant effect on IL-4 and IL-5 expression in asthma model mice [43]. Furthermore, no significant changes in IgE levels were observed in this study, potentially related to the specific microplastic type and the presence of additional additives. Furthermore, abnormal activation of Th17 cells can enhance Th2-mediated eosinophilic airway inflammation, potentially through dysregulation of the TTRPA1-p38 MAPK signaling pathway [46]. Collectively, microplastic exposure induces immune imbalance by shifting the response toward Th2-dominant immunity, while simultaneously exacerbating inflammatory progression in the presence of additives.

Toxicological analyses showed that the toxicity of MPs was associated with hERG blockers, eye irritation, and respiratory effects, and these effects were consistent with the pathogenic pathways of AR, confirming the important role of MPs in the progression of AR. The enrichment analysis of MPs affecting AR-related targets pointed to the “Regulation of Cell Death”, “Apoptotic Process” and other programmed death regulatory processes, and the results of the GSEA pathway showed that DNAJB9, SQSTM1, and MAPK9 were mainly enriched in “mTOR signaling pathway” and other processes. Differential expression analysis showed that these three targets were down-regulated in AR, and MPs may contribute to AR disease progression by negatively regulating programmed cell death.

The DNAJB9 gene encodes MRJ, a member of the heat shock protein 40 family, which is involved in protein folding, translocation, and degradation, and is essential for maintaining intracellular protein homeostasis [48]. Kim HY et al. found that ectopic repair of DNAJB9 inhibited migration, invasion, and lung colonization of triple-negative breast cancer cells,



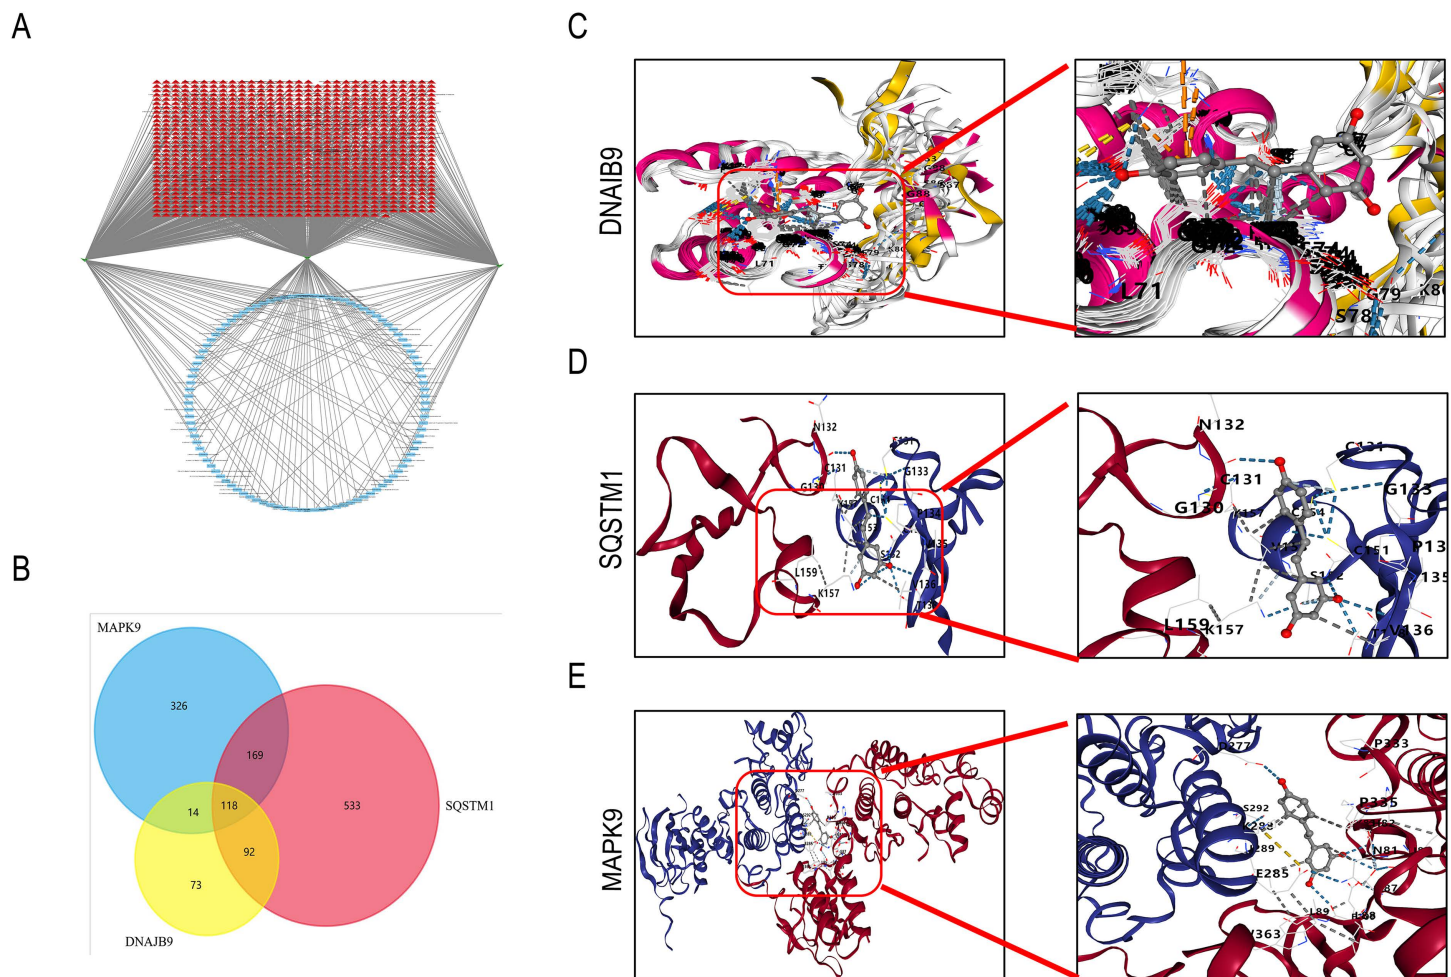

**Fig 6. Prediction of therapeutic drugs for key targets and molecular docking.** A. Prediction of therapeutic drugs for key targets based on the CTD database and presented as a key target-therapeutic drug network. Where green squares represent key targets, red squares represent therapeutic drugs, and blue squares represent therapeutic drugs shared by 3 targets. B. 118 shared therapeutic drugs were obtained by Venn diagrams. C-E. Molecular docking results of the 3 key targets with resveratrol, respectively.

<https://doi.org/10.1371/journal.pone.0334162.g006>

which stabilized the FBXO45 protein by inhibiting its ubiquitylation, and decreased the ZEB1 abundance, thereby inhibiting epithelial-mesenchymal transition (EMT) and metastasis [49]. In addition, DNAJB9 is involved in the degradation of cystic fibrosis-associated proteins as a tubulointerstitial co-chaperone and is a therapeutic target in cystic fibrosis nephritis [50]. However, the function of DNAJB9 in AR is unclear. In this study, DNAJB9 was found to be down-regulated in AR and enriched in the “mTOR signaling pathway”, etc. mTOR regulates cell growth, metabolism, and autophagy, and DNAJB9 may affect mTOR activity by modulating the folding and stability of related proteins. MPs may lead to the downregulation of DNAJB9, which promotes the proliferation of nasal mucosal epithelial cells and inhibits autophagy, thus contributing to the development of AR.

SQSTM1 (also known as p62) is an autophagy receptor protein that belongs to the activators of the non-classical KEAP1-NFE2L2/NRF2 pathway [51–53]. Because p62 accumulates when autophagy is inhibited and its level decreases when autophagy is induced, SQSTM1 can thus be used as a marker of autophagic flux [54]. SQSTM1 co-localizes with ubiquitylated protein aggregates in a variety of neurodegenerative disorders and hepatic proteinopathies [55–57].

**Table 3. Molecular docking of resveratrol with DNAJB9, SQSTM1, and MAPK9.**

|        | ID Cavities | Vina score | volume center | x center | y center | z size  |
|--------|-------------|------------|---------------|----------|----------|---------|
| SQSTM1 | 1           | -5.8       | 232           | 146.743  | 176.343  | 232.893 |
|        | 2           | -5.4       | 90            | 155.104  | 170.043  | 237.257 |
|        | 3           | -4.8       | 33            | 144.543  | 161.249  | 242.341 |
|        | 4           | -4.8       | 29            | 151.824  | 161.801  | 228.781 |
|        | 5           | -4.4       | 15            | 154.32   | 182.612  | 238.982 |
| DNAJB9 | 1           | -94.8      | 1793          | 4.407    | 10.079   | -4.922  |
|        | 2           | -79.1      | 842           | 5.237    | 17.197   | 10.288  |
|        | 3           | -73.6      | 138           | -8.823   | 10.663   | 5.216   |
|        | 4           | -66.8      | 47            | -12.106  | -3.433   | -3.645  |
|        | 5           | -58.8      | 42            | -7.031   | 16.08    | 11.506  |
| MAPK9  | 1           | -6.8       | 842           | 39.411   | -20.462  | -11.75  |
|        | 2           | -6.3       | 623           | 53.604   | -25.892  | -16.211 |
|        | 3           | -6.2       | 423           | -6.78    | -24.873  | 20.747  |
|        | 4           | -6.1       | 413           | 29.102   | -27.891  | 0.132   |
|        | 5           | -5.9       | 350           | 39.576   | -24.276  | -56.974 |

<https://doi.org/10.1371/journal.pone.0334162.t003>

However, the role of SQSTM1 in AR remains poorly understood. Liu N et al. identified differentially expressed proteins in the urine of AR patients by mass spectrometry proteomics and found that SQSTM1 was associated with protein structural domain-specific binding [58]. In the present study, SQSTM1 was down-regulated in AR and was enriched in important pathways such as the “phosphatidylinositol signaling system” and the “mTOR signaling pathway”. MPs may upregulate autophagy in the mTOR pathway through the downregulation of SQSTM1, thereby protecting nasal mucosal epithelial cells from the toxic stimulation of MPs and inhibiting the development of AR.

MAPK9 is a member of the MAPK family that encodes a kinase that plays a key role in cellular stress, gene transcription, cell growth, apoptosis, and neurodevelopment. [59]. Studies have shown that MAPK9 presents overexpression in a variety of tumors and promotes tumor progression. For example, a study by Wang Z et al. found that CircRNF20 stimulated the proliferation of non-small cell lung cancer by activating MAPK9 [60]. In addition, JinZe L et al. identified MAPK9 as a key gene related to iron death by bioinformatics methods and indicated that it may promote the progression of spinal cord injury [61]. Meanwhile, Yingying Z et al. found that MPs may induce micro mitochondrial autophagy and apoptosis in zebrafish intestinal epithelial cells through the Kras/MAPK signaling pathway [62]. However, the role of MAPK9 protein in AR has not been reported. However, the role of MAPK9 in AR has not been reported. The results of the present study indicate that MAPK9 is down-regulated in AR and is enriched in the processes of “basic transcription factor”, “β-alanine metabolism” and “spliceosome”. MPs may inhibit autophagy and promote apoptosis by down-regulating MAPK9, thus promoting the development of AR.

In a drug prediction and molecular docking study, we identified resveratrol as a natural small-molecule compound capable of interfering with the effects of MPs on AR. It has been shown that resveratrol can attenuate the toxic response of MPs in humans. For example, Xingpei F et al. found that treatment with the antioxidant resveratrol inhibited ROS-induced activation of the NFκB-MAPK signaling pathway in mice by constructing a nanoplastic mouse model, which in turn ameliorated nanoplastic-induced glucose and lipid metabolism disorders [36]. Shiwakoti S et al. also found that, in the polystyrene nanoplastic swine model resveratrol was able to attenuate polystyrene-induced endothelial senescence and dysfunction [38]. In addition, many studies have demonstrated the potential role of resveratrol in the treatment of allergic rhinitis, as it can effectively alleviate AR in mice by inhibiting the oxidative stress pathway of TXNIP, and its mediated activation of SIRT1 also attenuates ovalbumin-induced AR in mice [63]. Therefore, resveratrol can be used as a promising natural small-molecule compound for the treatment of the toxic effects of MPs on AR.

In summary, the findings of this study provide a theoretical basis for the health hazards posed by microplastics and offer a potential new therapeutic target for allergic rhinitis, facilitating the development of more effective treatments or interventions. However, this research primarily relies on network analysis and molecular docking simulations, lacking validation through in vivo and in vitro experiments. Further experimental studies are required to validate these findings. Additionally, given the wide variety of microplastics, future research should be expanded to include more types of microplastics.

## 5 Conclusion

This study investigated the toxic mechanisms by which MPs induce AR through ADMETlab toxicity assessment, multi-omics target screening, and functional enrichment analysis. Three core targets—DNAJB9, SQSTM1, and MAPK9—were identified as key regulators of AR progression by modulating critical biological pathways including apoptosis and autophagy. Simultaneously, it confirmed that resveratrol exhibits strong binding affinity with these three targets, demonstrating molecular potential as a therapeutic agent for microplastic-related AR. This study provides molecular mechanistic evidence for environmental aetiology research on microplastic-related allergic rhinitis.

## Supporting information

**S1 Table. All the original data in the study.**

(XLSX)

**S2 Table. Intersection of microplastic toxicity targets and differentially expressed genes in allergic rhinitis.**

(DOC)

## Author contributions

**Conceptualization:** Yaojun Wang, Dandan Xu.

**Funding acquisition:** Dandan Xu.

**Investigation:** Yaojun Wang, Dandan Xu.

**Methodology:** Yaojun Wang.

**Validation:** Yaojun Wang.

**Visualization:** Yaojun Wang.

**Writing – original draft:** Yaojun Wang.

## References

1. Han M, Liu H, Zhu T, Tang S, Li Y, Zhu C, et al. Toxic effects of micro(nano)-plastics on terrestrial ecosystems and human health. *TrAC Trends in Analytical Chemistry*. 2024;172:117517. <https://doi.org/10.1016/j.trac.2023.117517>
2. Grzelak A. From environment to body: Microplastics' sources, pathways, and health repercussions. *Journal of Education, Health and Sport*. 2024;75:56606.
3. Thompson RC, Olsen Y, Mitchell RP, Davis A, Rowland SJ, John AWG, et al. Lost at sea: where is all the plastic? *Science*. 2004;304(5672):838. <https://doi.org/10.1126/science.1094559> PMID: [15131299](https://pubmed.ncbi.nlm.nih.gov/15131299/)
4. Koelmans AA, Mohamed Nor NH, Hermesen E, Kooi M, Mintenig SM, De France J. Microplastics in freshwaters and drinking water: Critical review and assessment of data quality. *Water Res*. 2019;155:410–22. <https://doi.org/10.1016/j.watres.2019.02.054> PMID: [30861380](https://pubmed.ncbi.nlm.nih.gov/30861380/)
5. Weinstein JE, Viado HF, Leads RR. Microplastics: A global water pollution problem. *Encyclopedia of Water*. 2019;1–15.
6. Chauhan M, Sharma B, Chaudhary GR. Microplastics Pollution: An Overview of the Global Crisis. *Microplastics in Environment*. 2025;1–5.
7. Alimba CG, Faggio C. Microplastics in the marine environment: Current trends in environmental pollution and mechanisms of toxicological profile. *Environ Toxicol Pharmacol*. 2019;68:61–74. <https://doi.org/10.1016/j.etap.2019.03.001> PMID: [30877952](https://pubmed.ncbi.nlm.nih.gov/30877952/)

8. Chen G, Feng Q, Wang J. Mini-review of microplastics in the atmosphere and their risks to humans. *Sci Total Environ.* 2020;703:135504. <https://doi.org/10.1016/j.scitotenv.2019.135504> PMID: [31753503](#)
9. Bao M, Xiang X, Huang J, Kong L, Wu J, Cheng S. Microplastics in the Atmosphere and Water Bodies of Coastal Agglomerations: A Mini-Review. *Int J Environ Res Public Health.* 2023;20(3):2466. <https://doi.org/10.3390/ijerph20032466> PMID: [36767835](#)
10. Kim D, Kim SA, Nam S-H, Kwak JI, Kim L, Lee T-Y, et al. Microplastic ingestion in aquatic and soil biota: A comprehensive review of laboratory studies on edible size and intake pattern. *Mar Pollut Bull.* 2024;200:116056. <https://doi.org/10.1016/j.marpolbul.2024.116056> PMID: [38266480](#)
11. Vattanasit U, Kongpran J, Ikeda A. Airborne microplastics: A narrative review of potential effects on the human respiratory system. *Sci Total Environ.* 2023;904:166745. <https://doi.org/10.1016/j.scitotenv.2023.166745> PMID: [37673257](#)
12. Xue J, Li X, Lv X. Preliminary study of microplastic in allergic rhinitis. *Ear, Nose & Throat Journal.* 2025;1590119833.
13. Liu M, Zhang X, Huang X, Yang C. Effects of microplastics on allergic airways and potential pathogenesis: a review. *Environ Geochem Health.* 2025;47(10):412. <https://doi.org/10.1007/s10653-025-02732-1> PMID: [40853394](#)
14. Leslie HA, van Velzen MJM, Brandsma SH, Vethaak AD, Garcia-Vallejo JJ, Lamoree MH. Discovery and quantification of plastic particle pollution in human blood. *Environ Int.* 2022;163:107199. <https://doi.org/10.1016/j.envint.2022.107199> PMID: [35367073](#)
15. Ragusa A, Svelato A, Santacroce C, Catalano P, Notarstefano V, Carnevali O, et al. Placententa: First evidence of microplastics in human placenta. *Environ Int.* 2021;146:106274. <https://doi.org/10.1016/j.envint.2020.106274> PMID: [33395930](#)
16. Prata JC. Airborne microplastics: Consequences to human health? *Environ Pollut.* 2018;234:115–26. <https://doi.org/10.1016/j.envpol.2017.11.043> PMID: [29172041](#)
17. Huang J, Dong G, Liang M, Wu X, Xian M, An Y, et al. Toxicity of micro(nano)plastics with different size and surface charge on human nasal epithelial cells and rats via intranasal exposure. *Chemosphere.* 2022;307(Pt 4):136093. <https://doi.org/10.1016/j.chemosphere.2022.136093> PMID: [36029863](#)
18. Meltzer EO. Allergic rhinitis: burden of illness, quality of life, comorbidities, and control. *Immunol Allergy Clin North Am.* 2016;36(2):235–48.
19. Bousquet J, Vignola AM, Campbell AM. Pathophysiology of allergic rhinitis. *International Archives of Allergy and Immunology.* 1996;110(3):207–18.
20. İsmi O, Özcan C, Karabacak T, Polat G, Vayisoğlu Y, Güçlütürk T, et al. Local Effect of Neurotrophin-3 in Neuronal Inflammation of Allergic Rhinitis: Preliminary Report. *Balkan Med J.* 2015;32(4):364–70. <https://doi.org/10.5152/balkanmedj.2015.151028> PMID: [26740895](#)
21. Sharma R, Bhat P. Management of allergic rhinitis with Rajanyadi Churna and Guduchi Kwatha- A case report. *J Ayurveda Integr Med.* 2023;14(4):100740. <https://doi.org/10.1016/j.jaim.2023.100740> PMID: [37478634](#)
22. Bousquet J, Khaltaev N, Cruz AA, Denburg J, Fokkens WJ, Togias A, et al. Allergic Rhinitis and its Impact on Asthma (ARIA) 2008 update (in collaboration with the World Health Organization, GA(2)LEN and AllerGen). *Allergy.* 2008;63 Suppl 86:8–160. <https://doi.org/10.1111/j.1398-9995.2007.01620.x> PMID: [18331513](#)
23. Tuna A, Taş BM, Başaran Kankılıç G, Koçak FM, Şencan Z, Cömert E, et al. Detection of microplastics in patients with allergic rhinitis. *Eur Arch Otorhinolaryngol.* 2023;280(12):5363–7. <https://doi.org/10.1007/s00405-023-08105-7> PMID: [37410148](#)
24. Cao J, Xu R, Geng Y, Xu S, Guo M. Exposure to polystyrene microplastics triggers lung injury via targeting toll-like receptor 2 and activation of the NF-κB signal in mice. *Environ Pollut.* 2023;320:121068. <https://doi.org/10.1016/j.envpol.2023.121068> PMID: [36641069](#)
25. Tao W, Xu X, Wang X, Li B, Wang Y, Li Y, et al. Network pharmacology-based prediction of the active ingredients and potential targets of Chinese herbal Radix Curcumae formula for application to cardiovascular disease. *J Ethnopharmacol.* 2013;145(1):1–10. <https://doi.org/10.1016/j.jep.2012.09.051> PMID: [23142198](#)
26. Fu L, Shi S, Yi J, He Y, Wu Z, Peng J, et al. ADMETlab 3.0: an updated comprehensive online ADMET prediction platform enhanced with broader coverage, improved performance, API functionality and decision support. *Nucleic Acids Res.* 2024;52(W1):W422–W431.
27. Davis AP, Wiegers TC, Sciaky D. Comparative toxicogenomics database's 20th anniversary: update 2025. *Nucleic Acids Res.* 2024.
28. Kim S, Chen J, Cheng T, Gindulyte A, He J, He S, et al. PubChem in 2021: new data content and improved web interfaces. *Nucleic Acids Res.* 2021;49(D1):D1388–95. <https://doi.org/10.1093/nar/gkaa971> PMID: [33151290](#)
29. Chen T, Liu Y-X, Huang L. ImageGP: An easy-to-use data visualization web server for scientific researchers. *Imeta.* 2022;1(1):e5. <https://doi.org/10.1002/imt2.5> PMID: [38867732](#)
30. Kanehisa M, Goto S. KEGG: kyoto encyclopedia of genes and genomes. *Nucleic Acids Res.* 2000;28(1):27–30. <https://doi.org/10.1093/nar/28.1.27> PMID: [10592173](#)
31. Taguchi T, Mukai K, Takaya E. STING Operation at the ER/Golgi Interface. *Front Immunol.* 2021;12:646304.
32. Subramanian A, Tamayo P, Mootha VK, Mukherjee S, Ebert BL, Gillette MA, et al. Gene set enrichment analysis: a knowledge-based approach for interpreting genome-wide expression profiles. *Proc Natl Acad Sci U S A.* 2005;102(43):15545–50. <https://doi.org/10.1073/pnas.0506580102> PMID: [16199517](#)
33. Burley SK, Bhikadiya C, Bi C, Bittrich S, Chao H, Chen L, et al. RCSB Protein Data bank: Tools for visualizing and understanding biological macromolecules in 3D. *Protein Sci.* 2022;31(12):e4482. <https://doi.org/10.1002/pro.4482> PMID: [36281733](#)



34. Zhang Y, Ren J, Zhu S, Guo Z, Pei H, Sun X, et al. Integrative Analysis of Pharmacology and Transcriptomics Predicts Resveratrol Will Ameliorate Microplastics-Induced Lung Damage by Targeting Ccl2 and Esr1. *Toxics*. 2024;12(12):910. <https://doi.org/10.3390/toxics12120910> PMID: [39771125](https://pubmed.ncbi.nlm.nih.gov/39771125/)
35. Tain Y, Chang-Chien G, Lin S. Protective effect of resveratrol on kidney disease and hypertension against microplastics exposure in male juvenile rats. *Antioxidants*. 2024;13(12):1457.
36. Fan X, Li X, Li J, Zhang Y, Wei X, Hu H, et al. Polystyrene nanoplastics induce glycolipid metabolism disorder via NF- $\kappa$ B and MAPK signaling pathway in mice. *J Environ Sci (China)*. 2024;137:553–66. <https://doi.org/10.1016/j.jes.2023.02.040> PMID: [37980039](https://pubmed.ncbi.nlm.nih.gov/37980039/)
37. Zangene S, Goorani S, Morovvati H, Anbara H. Effects of polystyrene microplastics on mice cardiac tissue structure: Protective role of resveratrol. *Chemosphere*. 2025;379:144406. <https://doi.org/10.1016/j.chemosphere.2025.144406> PMID: [40262232](https://pubmed.ncbi.nlm.nih.gov/40262232/)
38. Shiwakoti S, Ko J-Y, Gong D, Dhakal B, Lee J-H, Adhikari R, et al. Effects of polystyrene nanoplastics on endothelium senescence and its underlying mechanism. *Environ Int*. 2022;164:107248. <https://doi.org/10.1016/j.envint.2022.107248> PMID: [35461096](https://pubmed.ncbi.nlm.nih.gov/35461096/)
39. Yuan Z, Nag R, Cummins E. Human health concerns regarding microplastics in the aquatic environment - From marine to food systems. *Sci Total Environ*. 2022;823:153730. <https://doi.org/10.1016/j.scitotenv.2022.153730> PMID: [35143789](https://pubmed.ncbi.nlm.nih.gov/35143789/)
40. Choudhury A, Simnani FZ, Singh D, Patel P, Sinha A, Nandi A, et al. Atmospheric microplastic and nanoplastic: The toxicological paradigm on the cellular system. *Ecotoxicol Environ Saf*. 2023;259:115018. <https://doi.org/10.1016/j.ecoenv.2023.115018> PMID: [37216859](https://pubmed.ncbi.nlm.nih.gov/37216859/)
41. Xu M, Halimu G, Zhang Q, Song Y, Fu X, Li Y, et al. Internalization and toxicity: A preliminary study of effects of nanoplastic particles on human lung epithelial cell. *Sci Total Environ*. 2019;694:133794. <https://doi.org/10.1016/j.scitotenv.2019.133794> PMID: [31756791](https://pubmed.ncbi.nlm.nih.gov/31756791/)
42. Halimu G, Zhang Q, Liu L, Zhang Z, Wang X, Gu W, et al. Toxic effects of nanoplastics with different sizes and surface charges on epithelial-to-mesenchymal transition in A549 cells and the potential toxicological mechanism. *J Hazard Mater*. 2022;430:128485. <https://doi.org/10.1016/j.jhazmat.2022.128485> PMID: [35739668](https://pubmed.ncbi.nlm.nih.gov/35739668/)
43. Yang S, Cheng Y, Chen Z, Liu T, Yin L, Pu Y, et al. In vitro evaluation of nanoplastics using human lung epithelial cells, microarray analysis and co-culture model. *Ecotoxicol Environ Saf*. 2021;226:112837. <https://doi.org/10.1016/j.ecoenv.2021.112837> PMID: [34619472](https://pubmed.ncbi.nlm.nih.gov/34619472/)
44. Xu M, Chen J, Gao L, Cai S, Dong H. Microplastic exposure induces HSP90 $\alpha$  secretion and aggravates asthmatic airway remodeling via PI3K-Akt-mTOR pathway. *Ecotoxicol Environ Saf*. 2025;291:117828. <https://doi.org/10.1016/j.ecoenv.2025.117828> PMID: [39923560](https://pubmed.ncbi.nlm.nih.gov/39923560/)
45. Hu J-Q, Wang C-C, Ma R-X, Qi S-Q, Fu W, Zhong J, et al. Co-exposure to polyethylene microplastics and house dust mites aggravates airway epithelial barrier dysfunction and airway inflammation via CXCL1 signaling pathway in a mouse model. *Int Immunopharmacol*. 2025;146:113921. <https://doi.org/10.1016/j.intimp.2024.113921> PMID: [39732106](https://pubmed.ncbi.nlm.nih.gov/39732106/)
46. Han Q, Gao X, Wang S, Wei Z, Wang Y, Xu K, et al. Co-exposure to polystyrene microplastics and di-(2-ethylhexyl) phthalate aggravates allergic asthma through the TRPA1-p38 MAPK pathway. *Toxicol Lett*. 2023;384:73–85. <https://doi.org/10.1016/j.toxlet.2023.07.013> PMID: [37500026](https://pubmed.ncbi.nlm.nih.gov/37500026/)
47. Wu Q, Li R, You Y, Cheng W, Li Y, Feng Y, et al. Lung microbiota participated in fibrous microplastics (MPs) aggravating OVA-induced asthma disease in mice. *Food Chem Toxicol*. 2024;190:114776. <https://doi.org/10.1016/j.fct.2024.114776> PMID: [38851522](https://pubmed.ncbi.nlm.nih.gov/38851522/)
48. Lee HJ, Kim JM, Kim KH, Heo JI, Kwak SJ, Han JA. Genotoxic stress/p53-induced DNAJB9 inhibits the pro-apoptotic function of p53. *Cell Death Differ*. 2015;22(1):86–95. <https://doi.org/10.1038/cdd.2014.116> PMID: [25146923](https://pubmed.ncbi.nlm.nih.gov/25146923/)
49. Kim H-Y, Kim Y-M, Hong S. DNAJB9 suppresses the metastasis of triple-negative breast cancer by promoting FBXO45-mediated degradation of ZEB1. *Cell Death Dis*. 2021;12(5):461. <https://doi.org/10.1038/s41419-021-03757-x> PMID: [33966034](https://pubmed.ncbi.nlm.nih.gov/33966034/)
50. Huang Y, Arora K, Mun KS, Yang F, Moon C, Yarlagadda S, et al. Targeting DNAJB9, a novel ER luminal co-chaperone, to rescue  $\Delta$ F508-CFTR. *Sci Rep*. 2019;9(1):9808. <https://doi.org/10.1038/s41598-019-46161-4> PMID: [31285458](https://pubmed.ncbi.nlm.nih.gov/31285458/)
51. Komatsu M, Kurokawa H, Waguri S, Taguchi K, Kobayashi A, Ichimura Y, et al. The selective autophagy substrate p62 activates the stress responsive transcription factor Nrf2 through inactivation of Keap1. *Nat Cell Biol*. 2010;12(3):213–23. <https://doi.org/10.1038/ncb2021> PMID: [20173742](https://pubmed.ncbi.nlm.nih.gov/20173742/)
52. Ichimura Y, Waguri S, Sou Y-S, Kageyama S, Hasegawa J, Ishimura R, et al. Phosphorylation of p62 activates the Keap1-Nrf2 pathway during selective autophagy. *Mol Cell*. 2013;51(5):618–31. <https://doi.org/10.1016/j.molcel.2013.08.003> PMID: [24011591](https://pubmed.ncbi.nlm.nih.gov/24011591/)
53. Katsuragi Y, Ichimura Y, Komatsu M. p62/SQSTM1 functions as a signaling hub and an autophagy adaptor. *FEBS J*. 2015;282(24):4672–8. <https://doi.org/10.1111/febs.13540> PMID: [26432171](https://pubmed.ncbi.nlm.nih.gov/26432171/)
54. Bjorkoy G, Lamark T, Pankiv S. Monitoring autophagic degradation of p62/SQSTM1. *Methods Enzymol*. 2009;452:181–97.
55. Ferrin G, Guerrero M, Amado V. Activation of mTOR signaling pathway in hepatocellular carcinoma. *Int J Mol Sci*. 2020;21(4).
56. Lee DH, Park JS, Lee YS, Han J, Lee D-K, Kwon SW, et al. SQSTM1/p62 activates NFE2L2/NRF2 via ULK1-mediated autophagic KEAP1 degradation and protects mouse liver from lipotoxicity. *Autophagy*. 2020;16(11):1949–73. <https://doi.org/10.1080/15548627.2020.1712108> PMID: [31913745](https://pubmed.ncbi.nlm.nih.gov/31913745/)
57. Ma S, Attarwala IY, Xie X-Q. SQSTM1/p62: A Potential Target for Neurodegenerative Disease. *ACS Chem Neurosci*. 2019;10(5):2094–114. <https://doi.org/10.1021/acschemneuro.8b00516> PMID: [30657305](https://pubmed.ncbi.nlm.nih.gov/30657305/)
58. Liu N, Wang J, Wang X, Zhang M. Analysis of urine differential proteins in patients with allergic rhinitis. *Heliyon*. 2023;9(6):e17323. <https://doi.org/10.1016/j.heliyon.2023.e17323> PMID: [37426793](https://pubmed.ncbi.nlm.nih.gov/37426793/)
59. Krens SFG, Spaik HP, Snaar-Jagalska BE. Functions of the MAPK family in vertebrate-development. *FEBS Lett*. 2006;580(21):4984–90. <https://doi.org/10.1016/j.febslet.2006.08.025> PMID: [16949582](https://pubmed.ncbi.nlm.nih.gov/16949582/)



60. Wang Z-X, Zhao Y, Wang Y-B, Zhang Q, Zou Q-X, Liang F-H, et al. CircRNF20 aggravates the progression of non-small-cell lung carcinoma by activating MAPK9. *Eur Rev Med Pharmacol Sci*. 2020;24(19):9981–9. <https://doi.org/10.26355/eurev.202010.23211> PMID: [33090403](https://pubmed.ncbi.nlm.nih.gov/33090403/)
61. Li J-Z, Fan B-Y, Sun T, Wang X-X, Li J-J, Zhang J-P, et al. Bioinformatics analysis of ferroptosis in spinal cord injury. *Neural Regen Res*. 2023;18(3):626–33. <https://doi.org/10.4103/1673-5374.350209> PMID: [36018187](https://pubmed.ncbi.nlm.nih.gov/36018187/)
62. Zhang Y, Jiang Y, Zhu Z, Xu X, Yang H. Polyacrylonitrile microfibers pose a significant threat to the early-stage survival of zebrafish. *Aquat Toxicol*. 2023;265:106755. <https://doi.org/10.1016/j.aquatox.2023.106755> PMID: [37944326](https://pubmed.ncbi.nlm.nih.gov/37944326/)
63. Li J, Wang B, Luo Y, Zhang Q, Bian Y, Wang R. Resveratrol-mediated SIRT1 activation attenuates ovalbumin-induced allergic rhinitis in mice. *Mol Immunol*. 2020;122:156–62. <https://doi.org/10.1016/j.molimm.2020.04.009> PMID: [32361418](https://pubmed.ncbi.nlm.nih.gov/32361418/)
